# Supplementary material for: Phenotypic Variation of Sorghum Accessions for Grain Yield and Quality Traits
Source: MDPI journal article supplement (doi:10.3390/agronomy12123089), 2022-12-06
Supplement: s1 [file s1]

# Supplementary

**Table S1.** Mean values of grain protein, starch, tannin, moisture, grain yield and sorghum types based on tannin content.

| No. | Accession        | Protein (%) | Starch (%) | Tannin (mg CE/100 mg) | Grain yield (g/panicle) | Moisture (%) | Grain colour | Tannin Type |
|-----|------------------|-------------|------------|-----------------------|-------------------------|--------------|--------------|-------------|
| 1   | Belele Lehubedu  | 13,28       | 61,92      | 0,02                  | 67,07                   | 10,29        | Brown        | I           |
| 2   | Framida          | 14,12       | 59,41      | 17,61                 | 73,43                   | 10,57        | Brown        | III         |
| 3   | Hakika           | 12,78       | 61,56      | 0,10                  | 58,82                   | 10,39        | White        | I           |
| 4   | Lenthate         | 13,09       | 59,92      | 0,25                  | 96,48                   | 10,75        | Brown        | I           |
| 5   | M100             | 14,56       | 59,96      | 0,22                  | 53,54                   | 10,29        | White        | I           |
| 6   | Mabele a sesotho | 13,92       | 62,40      | 0,34                  | 75,34                   | 10,48        | Red          | I           |
| 7   | Makhumusha coll. | 15,73       | 58,42      | 0,00                  | 57,85                   | 10,39        | White        | I           |
| 8   | Mammopane        | 13,65       | 60,88      | 0,00                  | 87,05                   | 10,88        | Brown        | III         |
| 9   | Mamolokwane      | 13,89       | 64,80      | 0,48                  | 81,86                   | 10,99        | Brown        | I           |
| 10  | Manthate         | 13,87       | 57,74      | 0,87                  | 81,98                   | 10,81        | Red          | I           |
| 11  | Mapimkana        | 12,96       | 64,79      | 0,29                  | 75,09                   | 10,50        | Red          | I           |
| 12  | Maseka a swere   | 13,75       | 63,94      | 0,00                  | 88,13                   | 10,26        | White        | I           |
| 13  | SA 0009          | 13,91       | 60,51      | 0,34                  | 81,73                   | 10,48        | White        | I           |
| 14  | SA 0020          | 12,22       | 58,54      | 10,35                 | 66,47                   | 10,88        | Brown        | III         |
| 15  | SA 0037          | 13,49       | 63,86      | 0,00                  | 67,81                   | 11,28        | Brown        | I           |
| 16  | SA 0062          | 14,40       | 62,94      | 0,00                  | 84,51                   | 11,08        | Brown        | I           |
| 17  | SA 0108          | 14,24       | 59,94      | 0,25                  | 44,14                   | 10,13        | Brown        | I           |
| 18  | SA 0109          | 12,31       | 66,58      | 0,00                  | 66,06                   | 10,62        | White        | II          |
| 19  | SA 0117          | 13,03       | 64,83      | 0,00                  | 58,72                   | 10,68        | Brown        | I           |
| 20  | SA 0123          | 14,59       | 61,53      | 0,79                  | 58,62                   | 9,86         | White        | I           |
| 21  | SA 0126          | 14,94       | 57,64      | 0,00                  | 78,73                   | 10,16        | White        | I           |
| 22  | SA 0133          | 11,77       | 61,98      | 4,27                  | 86,49                   | 10,98        | Brown        | III         |
| 23  | SA 0190          | 15,14       | 58,35      | 0,35                  | 61,57                   | 10,01        | White        | I           |
| 24  | SA 0213          | 11,23       | 67,43      | 0,00                  | 84,89                   | 11,28        | Red          | I           |
| 25  | SA 0223          | 12,02       | 59,72      | 24,40                 | 73,38                   | 10,50        | Brown        | III         |
| 26  | SA 0260          | 14,53       | 61,47      | 0,13                  | 86,50                   | 10,26        | White        | I           |
| 27  | SA 0273          | 12,85       | 64,08      | 0,00                  | 59,70                   | 10,48        | White        | I           |
| 28  | SA 0347          | 12,56       | 60,29      | 0,45                  | 60,90                   | 10,57        | Red          | I           |
| 29  | SA 0369          | 13,50       | 58,55      | 1,01                  | 58,43                   | 10,48        | Brown        | III         |
| 30  | SA 0390          | 10,41       | 61,05      | 10,41                 | 84,50                   | 10,88        | Brown        | III         |
| 31  | SA 0423          | 13,36       | 65,82      | 2,92                  | 60,27                   | 10,69        | Brown        | III         |
| 32  | SA 0526          | 13,89       | 58,37      | 0,00                  | 42,87                   | 10,45        | White        | I           |
| 33  | SA 0529          | 14,60       | 62,93      | 0,00                  | 59,43                   | 10,11        | Brown        | I           |
| 34  | SA 0530          | 15,02       | 63,40      | 0,13                  | 36,66                   | 9,83         | White        | I           |
| 35  | SA 0546          | 12,79       | 65,70      | 9,69                  | 64,37                   | 10,36        | Brown        | III         |
| 36  | SA 0550          | 15,29       | 62,88      | 0,00                  | 55,86                   | 9,97         | White        | I           |
| 37  | SA 0560          | 14,14       | 48,90      | 18,33                 | 63,84                   | 9,96         | Brown        | III         |
| 38  | SA 0567          | 15,53       | 54,83      | 4,52                  | 66,76                   | 9,55         | White        | II          |
| 39  | SA 0572          | 16,02       | 56,10      | 0,00                  | 79,17                   | 10,13        | White        | II          |
| 40  | SA 0575          | 13,68       | 61,86      | 8,38                  | 53,52                   | 10,48        | Brown        | III         |
| 41  | SA 0583          | 11,32       | 61,09      | 8,26                  | 45,21                   | 10,90        | Brown        | III         |

|    |         |       |       |       |        |       |       |     |
|----|---------|-------|-------|-------|--------|-------|-------|-----|
| 42 | SA 0597 | 15,46 | 54,56 | 0,00  | 46,28  | 9,66  | Brown | I   |
| 43 | SA 0614 | 14,34 | 58,26 | 0,00  | 61,45  | 9,99  | White | I   |
| 44 | SA 0615 | 16,52 | 56,13 | 0,14  | 48,89  | 9,59  | Brown | I   |
| 45 | SA 0622 | 13,18 | 58,81 | 4,41  | 43,18  | 10,36 | White | II  |
| 46 | SA 0623 | 13,75 | 54,93 | 6,25  | 61,47  | 10,13 | Brown | III |
| 47 | SA 0670 | 15,19 | 56,76 | 0,26  | 55,79  | 10,44 | White | I   |
| 48 | SA 0671 | 16,22 | 60,34 | 0,00  | 68,40  | 9,87  | White | I   |
| 49 | SA 0672 | 13,89 | 65,37 | 0,48  | 84,30  | 10,82 | Brown | I   |
| 50 | SA 0673 | 14,54 | 65,12 | 0,35  | 85,34  | 10,55 | Brown | I   |
| 51 | SA 0680 | 14,45 | 57,03 | 0,35  | 42,79  | 9,89  | White | I   |
| 52 | SA 0682 | 13,63 | 61,68 | 0,36  | 40,38  | 10,13 | White | I   |
| 53 | SA 0696 | 11,98 | 65,05 | 13,05 | 73,38  | 10,61 | Brown | III |
| 54 | SA 0700 | 14,49 | 57,54 | 0,00  | 46,54  | 10,46 | Brown | I   |
| 55 | SA 0718 | 14,20 | 57,04 | 2,61  | 86,78  | 10,19 | White | II  |
| 56 | SA 0720 | 13,00 | 60,00 | 6,24  | 60,07  | 10,70 | Brown | III |
| 57 | SA 0755 | 11,59 | 55,29 | 13,18 | 63,89  | 10,76 | Brown | III |
| 58 | SA 0808 | 15,08 | 55,51 | 0,46  | 50,25  | 10,09 | Brown | I   |
| 59 | SA 0842 | 13,46 | 60,47 | 0,00  | 44,17  | 10,14 | Brown | I   |
| 60 | SA 0920 | 13,16 | 63,55 | 0,00  | 48,07  | 10,68 | White | I   |
| 61 | SA 0954 | 14,81 | 62,33 | 0,00  | 98,26  | 10,60 | White | I   |
| 62 | SA 1072 | 12,88 | 61,15 | 0,00  | 73,08  | 10,38 | White | I   |
| 63 | SA 1092 | 16,20 | 62,02 | 0,39  | 61,39  | 10,56 | White | I   |
| 64 | SA 1117 | 14,65 | 57,58 | 1,04  | 42,95  | 10,49 | White | II  |
| 65 | SA 1278 | 16,59 | 55,85 | 0,46  | 38,41  | 9,36  | Brown | I   |
| 66 | SA 1282 | 12,13 | 66,04 | 0,22  | 47,80  | 10,23 | White | I   |
| 67 | SA 1442 | 13,63 | 64,40 | 0,02  | 66,80  | 10,34 | White | I   |
| 68 | SA 1556 | 15,13 | 65,58 | 0,13  | 49,33  | 10,50 | Brown | I   |
| 69 | SA 1562 | 15,06 | 61,10 | 0,90  | 70,29  | 10,73 | Brown | I   |
| 70 | SA 1564 | 15,65 | 57,26 | 0,00  | 75,22  | 10,56 | White | I   |
| 71 | SA 1646 | 15,17 | 57,91 | 0,29  | 47,46  | 10,34 | Brown | I   |
| 72 | SA 1678 | 13,36 | 58,65 | 0,00  | 51,21  | 10,46 | White | I   |
| 73 | SA 1730 | 13,44 | 61,78 | 1,67  | 45,96  | 10,85 | White | II  |
| 74 | SA 1732 | 16,07 | 64,15 | 0,22  | 37,45  | 9,58  | Brown | I   |
| 75 | SA 1734 | 14,49 | 61,39 | 0,63  | 56,81  | 10,53 | Brown | I   |
| 76 | SA 2011 | 14,91 | 56,95 | 0,00  | 37,61  | 9,52  | White | I   |
| 77 | SA 2020 | 14,19 | 56,80 | 0,02  | 39,48  | 10,44 | White | I   |
| 78 | SA 2080 | 14,21 | 61,54 | 0,46  | 80,43  | 10,22 | White | I   |
| 79 | SA 2093 | 13,83 | 62,62 | 0,68  | 62,90  | 9,91  | White | I   |
| 80 | SA 2097 | 12,00 | 65,33 | 9,69  | 114,90 | 10,59 | Brown | III |
| 81 | SA 2451 | 16,10 | 62,53 | 0,00  | 65,84  | 10,23 | White | I   |
| 82 | SA 2453 | 14,03 | 65,49 | 0,26  | 45,95  | 10,53 | Brown | I   |
| 83 | SA 2471 | 14,32 | 63,21 | 0,00  | 61,79  | 9,99  | Brown | I   |
| 84 | SA 2690 | 15,60 | 60,99 | 0,61  | 48,56  | 10,02 | Brown | I   |
| 85 | SA 2692 | 14,55 | 65,54 | 0,27  | 62,59  | 10,48 | White | I   |
| 86 | SA 2714 | 13,43 | 66,54 | 0,33  | 58,82  | 10,51 | White | I   |
| 87 | SA 2721 | 13,50 | 67,61 | 0,00  | 55,76  | 10,43 | Brown | I   |

|     |         |       |       |       |        |       |       |     |
|-----|---------|-------|-------|-------|--------|-------|-------|-----|
| 88  | SA 2748 | 12,79 | 66,97 | 0,00  | 67,68  | 10,49 | White | I   |
| 89  | SA 2840 | 14,07 | 47,39 | 0,00  | 53,48  | 9,91  | White | I   |
| 90  | SA 2849 | 13,50 | 60,37 | 0,00  | 56,11  | 10,32 | Brown | I   |
| 91  | SA 2913 | 13,87 | 62,68 | 7,58  | 56,00  | 10,58 | White | II  |
| 92  | SA 3125 | 14,49 | 61,78 | 0,09  | 81,48  | 10,16 | White | I   |
| 93  | SA 3710 | 14,48 | 57,82 | 11,32 | 101,12 | 10,52 | White | II  |
| 94  | SA 3711 | 12,39 | 60,90 | 8,68  | 87,20  | 10,48 | Red   | III |
| 95  | SA 4000 | 14,02 | 66,55 | 0,00  | 52,09  | 10,13 | Brown | I   |
| 96  | SA 4167 | 14,36 | 62,22 | 0,08  | 77,70  | 10,20 | White | I   |
| 97  | SA 930  | 14,75 | 59,43 | 0,00  | 66,59  | 10,46 | White | I   |
| 98  | SA0139  | 12,13 | 66,10 | 0,30  | 77,75  | 10,71 | Brown | I   |
| 99  | SA0221  | 15,59 | 51,89 | 22,38 | 47,49  | 9,54  | Brown | III |
| 100 | Wahi    | 12,59 | 64,78 | 0,00  | 82,15  | 10,65 | White | I   |

**Table S2.** Principal component analysis of biochemical traits among sorghum accessions showing eigenvectors, eigenvalues, individual and cumulative percentage of variation explained by the first two principal components (PC) axes.

| Traits                 | Eigenvectors |       |       |
|------------------------|--------------|-------|-------|
|                        | PC1          | PC2   | PC3   |
| Protein                | 0.54         | -0.20 | -0.46 |
| Starch                 | -0.41        | -0.54 | 0.20  |
| Tannin                 | -0.12        | 0.81  | 0.15  |
| Grain yield            | -0.42        | 0.12  | -0.85 |
| Moisture               | -0.58        | -0.05 | 0.02  |
| <b>Eigenvalue</b>      | 2.20         | 1.27  | 0.77  |
| <b>Variability (%)</b> | 86.96        | 8.76  | 2.14  |

**Table S3.** Cluster-wise mean values for all the accessions.

| Clusters   | Protein (%) | Starch (%) | Tannin (mg CE/100 mg) | Grain yield (g/panicle) | Moisture (%) |
|------------|-------------|------------|-----------------------|-------------------------|--------------|
| <b>I</b>   | 13,68       | 62,02      | 0,96                  | 54,64                   | 10,45        |
| <b>II</b>  | 15,15       | 58,75      | 0,67                  | 58,67                   | 9,99         |
| <b>III</b> | 14,86       | 50,40      | 20,36                 | 55,67                   | 9,75         |
| <b>IV</b>  | 12,09       | 60,75      | 12,85                 | 70,20                   | 10,66        |
| <b>V</b>   | 13,59       | 62,74      | 1,34                  | 85,74                   | 10,66        |
